# Supplementary material
Source: publisher site journal article supplement (https://www.dovepress.com/article/319220)
Supplement: Supplementary file 1 [file get_supplementary_file.php]

**SUPPLEMENTAL MATERIAL**

*To*: Bronchodilator response (BDR) in patients with COPD, asthma-COPD-overlap (ACO) and asthma, evaluated by plethysmographic and spirometric z-score target parameters
*Kraemer R. et al.*

1. Pulmonary Function Procedures

Only a limited number of studies have been published in the literature, applying plethysmography in addition to spirometry for the assessment of functional severity and/or BDR in COPD patients [1-5](#_ENREF_1). In the present study plethysmography including spirometry was performed using standard techniques according to ATS-ERS criteria [6](#_ENREF_6),[7](#_ENREF_7), previously established and extended subsequently [8-11](#_ENREF_8). In all 3 labs static and dynamic lung volumes, airway mechanics and flow-volume curves were assessed using a constant-volume body plethysmograph (Master Screen Body, Erich Jaeger GmbH, Würzburg, Germany) according to current recommendations [12](#_ENREF_12). Since the Jaeger MasterLab software (JLab) determines parameters which evaluate changes of airway dynamics concomitantly with changes in the end-expiratory lung volume (EELV) at FRC, it was important that these parameters of airway dynamics are measured in the 1st phase of plethysmographic assessment, and hence not influenced by deep inspiration or forced breathing maneuvers or other efforts [13-16](#_ENREF_13). A special export software was developed by PanGas Ltd, Dagmersellen, Switzerland, enabling access to all routinely stored parameters in each JLab, Sentry-Suite database resp.

In each center the same procedure of lung function testing was performed, with the patient in a seated position. In a 1st phase the assessment of airway dynamics, such as the effective, specific airway resistance (sReff), its reziprocal value, the effective, specific airway conductance (sGeff), and the aerodynamic work of breathing at rest (sWOB) were obtained during at least 8 to 10 breathing cycles of quiet breathing (no panting). In a 2nd phase FRCpleth at EELV was measured by at least 3 shutter closure maneuvers. Reproducibility of the occlusion-pressure curves provided FRC-volume recordings within a range of 7%. In a linked maneuvre the FRC measurement was%,directly followed by a 3rd phase with measurements of static lung volumes such as the expiratory reserve volume (RV), inspiratory capacity (IC), vitalcapacity (VC), and hence the total lung capacity (TLC). Only in a 4th phase at least 3 forced breathing maneuvers were performed measuring forced expired volume in 1 second (FEV1), forced vital capacity (FVC), maximal flows at 25% (FEF25), 50% (FEF50) and 75% (FEF75) of FVC, as well as the mid-flow between 25% to 75% of forced expired lung volume (FEF25-75), assessed by standard techniques [6](#_ENREF_6),[17](#_ENREF_17),[18](#_ENREF_18). For the plethysmographic measurements the median of at least 5 single plethysmographic tidalflow-shift volume-loops was calculated, and for the indices of the forced breathing parameters the maximum of the 3 valid efforts was taken, as soon as the best and second-best flow-volume-loops were comparable in their pattern. The pulmonary function test data were assessed in absolute values, and expressed as a percentage of predicted normal values, and as z-scores accordingly [6](#_ENREF_6),[17](#_ENREF_17),[19](#_ENREF_19). Flow-volume-calibrations (V’-V) of the pneumotachograph with a 3-L-syringe and the cabine shift volume calibration (Vpleth) applying a 50mL motor pump were performed daily in each center in the morning and at mid-day, and a so called “biological calibration” was performed monthly using a healthy technician as a biological control. Normative reference equations of airway dynamics, (sReff, sGeff, and sWOB) have been recently calculated [20](#_ENREF_20),[21](#_ENREF_21).

1. Assessment of Airway Dynamics by the Integral Method

The assessment of changes in airway caliber to estimate airway function in human subjects and patients with lung disease is best performed by measuring airway resistance using a whole-body plethysmograph, originally introduced by Dubois et al. [22](#_ENREF_22),[23](#_ENREF_23). This technique was further adapted by Jaeger and Otis [24](#_ENREF_24) in order to reach body temperature, ambient pressure and water saturation (BTPS) conditions. Changes in in the calibre of the large, conducting airways are represented by the recording of specific airway loops (sRaw-loops), consisting of the shift volume (Vpleth) and the tidal flow (V’) plot. The lung volume, and hence the resting level of end-expiratory lung volume (EELV) at functional residual capacity (FRCpleth) is logically altered in the presence of marked peripheral obstruction or pulmonary hyperinflation. It follows that plethysmography offers measurements of airway dynamics in close relationship to FRCpleth, and hence the EELV, which has considerable advantages in the detection of functional deficits compared to measurements of simple spirometry, impulse oscillometric (IOS) or interrupter resistance (Rint) measurements.

Until recently, and still used in many plethysmographs, sRaw loops are approximated routinely by two point analyses creating a straight line throughout the loop.

Absolute lung volume FRCpleth (functional residual capaity measured with the plethysmograph) is measured by applying a shutter maneuvre and analysing the occlsion-pressure curve.

Finally Raw (airways resistance) can be calculated from the ration of sRaw and FRCpleth.

The term (Pamb-PH2O) reflects the dry air pressure. It follows that Raw is inevitably linked to the value of FRCpleth as a fixed parameter in the equation, and is computed misleadingly low, if a pulmonary hyperinflation is present, and consistently high, if the subject breathes under his natural EELV. Noteworthy is that FRCpleth implicates a shutter occlusion manoeuvre, which is sometimes not tolerated by young children or elderly patients, as well as by patients with severe lung involvement. Moreover, Raw consistently ignores the loop-shaping of the sRaw-loop, especially during quiet breathing, and more importantly, if ventilation inhomogeneities are present.

Although numerous parameters of airway resistances can be calculated from plethysmographic measurements [25](#_ENREF_25), the most promising approach was proposed by Matthys H. and Orth U. [26](#_ENREF_26), defining the so called “effective specific resistance” (sReff) as a ratio of the area of the plethysmographic shift-volume versus tidal volume (), to the area of the flow/volume loop () throughout the entire respiratory cycle. Noteworthy, the integral multiplied by the dry air pressure (Pamb-PH2O) embodies the specific, aerodynamic work of breathing (sWOB) at rest [26](#_ENREF_26). Only advanced computer technology made it possible to assess the two integrals presented for infants, children [27](#_ENREF_27),[28](#_ENREF_28), as well as for adults [26](#_ENREF_26),[29](#_ENREF_29). The mathematical background computing sReff, sGeff and sWOB, has been presented previously [30](#_ENREF_30),[31](#_ENREF_31) showing the following equations:

where (Pamb-PH2O) is the dry air pressure, the integral the equivalent to the area enclosed by sWOB and the integral the equivalent to the area of the flow-volume loop. **Figure S1** synoptically represents a print-screen from a plethysmographic measurement of a healthy infants obtained in a infants whole-body plethysmograph [27](#_ENREF_27) . It shows a BTPS compensated plethysmographic loop, which is the flow dependence (V’) from the shift volume (∆Vpleth), derived from two further loops. The first loop (Figure S1; A) represents the tidal flow-volume curve, and its area as integral of the


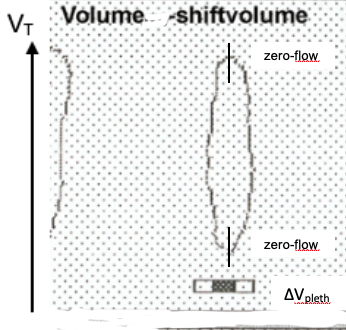

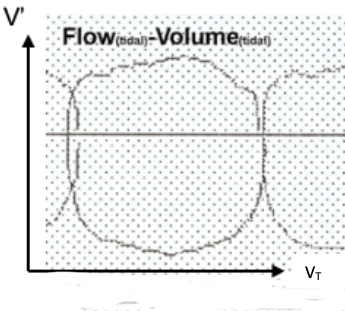


**The work of breathing loop**

**The breathing cycle**

Tidal flow-tidal volume loop

**The plethysmographic**

**tidal flow – shift volume loop**


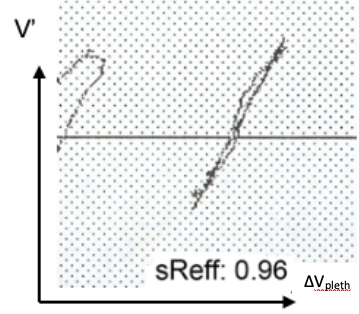


A

B

C

zero-flow

zero-flow

∆Vpleth

**Volume - shift volume**

**Flow(tidal) – Volume(tidal)**

sReff: 0.96 kPa*s

∆Vpleth

**Figure S1.** Print-screen from a plethysmographic measurement of a healthy infant synoptically representing the interaction of two loops, (A) the tidal flow-volume loop and its area as integral , and (B) the plethysmographic shift volume-tidal volume, incorporating the area , and hence the sWOB, from which (C) the BTPS-compensated plethysmographic loop, (shift volume (∆Vpleth) against tidal flow (V’) can be derived, and sReff, be computed.

breathing cycle. The second loop (Figure S1; B) characterises the tidal volume in relation to the plethysmographic shift volume and incorporates the area , and hence the sWOB. The determination of the sWOB is a prerequisite and part of the computation of sReff, sGeff, respecively (Figure S1; C), as soon as the subject breathes regularly at resting end-expiratory lung volume (EELV). Importantly however, any extended breathing manoeuvre prior to spontaneous resting breathing has to be avoided, ensuring airway dynamics are assessed under natural breathing conditions e.g., no panting, no breathing against a shutter, no change in the “volume history” [32-34](#_ENREF_32). Normal spontaneous resting breathing is provided, if the subject breaths naturally and regularly at a constant breathing frequency and constant tidal volume (VT) at EELV, and hence with lowest individual sWOB.

3. Defining predictive Equations of Airway Dynamics by a multi-linear Model

including confounding parameters influencing the actual breathing pattern and timing)

Predictive equations defining reference values of lung function in infants, children and adults are usually based on algorithms of the subject’s anthropometric measurements, such as age, body weight, body height or a combination of them, as independent variables [35](#_ENREF_35),[36](#_ENREF_36). Most of these regressions include linear, but also power- or quadric function relationships [17](#_ENREF_17). This may be suitable for some predictions of static lung volumes [19](#_ENREF_19),[35](#_ENREF_35),[37-39](#_ENREF_37), volume-time or flow-volume parameters [17](#_ENREF_17),[35](#_ENREF_35),[37](#_ENREF_37), and indices of intrapulmonary gas distribution [40-42](#_ENREF_40). A specific new approach to describe reference ranges more accurately has been developed by Stanojevic et al [43](#_ENREF_43), describing the relationship between spirometric lung function and height, age respectively within the pediatric age range, allowing a seamless transition to adulthood. An extension of the so called “LMS (lambda, mu, sigma) method” [44](#_ENREF_44) was applied. To our knowledge, however, prediction models using LMS-statistics incorporating age and height of the subjects as independent variables have only been formulated for spirometric parameters [39](#_ENREF_39). There is a relative dearth of normative reference values measuring parameters of airway dynamics transitionally from infancy into adulthood. Doershuk et al. [45](#_ENREF_45) first presented data of specific airway resistance (sRaw), showing gender differences in infants and children (sRaw males < sRaw females). Measuring airway resistance throughout the whole respiratory cycle in infants was performed by Beardsmore et al. [46](#_ENREF_46), demonstrating a dynamic performance of the respiratory circuit in relation to the breathing pattern, and suggesting that expiratory looping of the resistance slope could well be due to small airway closure as previously observed by Matthys in adults [47](#_ENREF_47).

However, the physiologic approach of Matthys and Orth [26](#_ENREF_26) to evaluate airway dynamics by the integral method putting sWOB () in relation to the tidal flow – volume loop () for sReff, its reciprocal ratio for sGeff respectively has not yet received scientific attention, although this technology has been implemented since years in each Jaeger plethysmograph. Furthermore, based on previous work [18](#_ENREF_18),[46](#_ENREF_46) regarding airway patency, but also based on previous work dealing with multiple breathe out techniques [48](#_ENREF_48), the hypothesis was formed that determinants of airway dynamics, EELV, breathing pattern and timing of breathing should be included into the evaluation of parameter prediction of airway dynamics.

In a forthcoming publication, therefore, regression equations from 352 measurements-sets obtained from a total of 348 control subjects, including 38 infants (24 males, 14 females), 44 children (23 males, 21 females) and 270 adults (72 males, 198 females) with an age distribution from 0.5-83.2 years were analysed. It turned out, that in the approach of defining airway dynamics (sReff, sGeff resp.), the most important factor is sWOB. Therefore, predicting equations must be defined for sWOB, from which in a second step sReff and sGeff can be defined. Apart from regressions including anthropometric measures, we discovered for sWOB at resting level the following multidimential regression as follows:

**sWOB** = EXP(-.300+.017*gender+.138*ln(age)+.836*ln(FRCpleth)
+.744*ln(VT/FRCpleth)+.387*ln(VT/TI) ± .109083)) (SEE)

*gender: male=0; female=1

Form this equation the following regression equations for the two parameters of airway dynamics could be defined:

**sGef**f = EXP(.816-.050*gender-.423*ln(sWOB)+.415*ln(FRCpleth)

+.603*ln(VT/FRCpleth)) ± .12781 (SEE)

*gender: male=0; female=1

**sRef**f = EXP(-.816+.050*gender+.423*ln(sWOB)-.415*ln(FRCpleth)
-.603*ln(VT/FRCpleth) ± .12781 (SEE)

*gender: male=0; female=1

1. Statistical approach applying pre-test functional disease severity and bronchodilator response (BDR) by expansion to the whole z-score distribution

As outlined in the “Introduction” of this paper, the complexity of COPD referring to components with interactions, and the heterogeneity occurring because not all components are present in all patients at the same time [49](#_ENREF_49),[50](#_ENREF_50), and especially not over life time [51](#_ENREF_51), implicate an integrative approach of physiologic management, and can hardly be assessed only by one or two spirometric parameters. COPD is physiologically a disease with various functional deficits (flow limitation, bronchial obstruction, pulmonary hyperinflation, small airway dysfunction), and the distinction into several phenotypical subtypes, especially ACO presupposes accurate estimation of a potential bronchodilator response (BDR).In the light of this functional diversity and complexity, the proposition to better address the complexity of COPD physiologically by classifying FEV1, FVC, and FEV1/FVC-ratios into z-scores [52-55](#_ENREF_52), and using the lower limit of normal (LLN) as cut-off [6](#_ENREF_6),[52-64](#_ENREF_52) was highly justified.

In our understanding, however, we found it suitable to check whether an enlargement from a dichotomic distinction of “above” or “lower” than LLN, ULN respectively, into a polytomic distribution of z-score intervals would give a more

adequate estimation of the degree of functional severity and BDR. Therefore, the pre-test z-scores of 5 parameters FEV1, FEF25-75, sGeff, sWOB and FRCpleth were attributed into 5 interval ranges in order to give insights into the functional diversities and their

| **Table S1.** Attribution of the pre-test z-scores of the FEV1, FEF25-75, sGeff, sWOB and FRCpleth into 5 interval ranges, to estimate the degree of functional severity and BDR | | | | |
| --- | --- | --- | --- | --- |
|  | | | | |
| **FEV1, FEF25-75, sGeff** | |  | **FRCpleth, sWOB** | |
|  |  |  |  |  |
| Confidence  interval (CI) | z-scores |  | z-scores | Confidence  interval (CI) |
|  |  |  |  |  |
| Normal (≥LLN; 5%) | >-1.645 |  | <1.645 | Normal (≤ULN; 5%) |
| <5% - ≥2.5% CI | <-1.645 - ≥-1.956 |  | >1.645 - ≤1.956 | <5% - ≥2.5% CI |
| <2.5% - ≥1.5% CI | <-1.956 - ≥-2.170 |  | >1.956 - ≤2.170 | <2.5% - ≥1.5% CI |
| <1.5% - ≥0.5% CI | <-2.170 - ≥-2.576 |  | >2.170 - ≤2.576 | <1.5% - ≥0.5% CI |
| <0.5 CI | <-2.576 |  | >2.576 | <0.5 CI |

interactions of functional severity using a multidimensional approach. The attribution into 5 severity groups according to different confidence interval ranges within the z-score distribution was as shown in Table S1

By the amplification and attribution of the pre-test z-scores into 5 functional severity level, the evaluation of the BDR in relation to its initial starting point gave different results for each target parameter. Since all values are corrected for gender, age, height and ethnicity, the degree of functional severity as well as the amount of BDR are comparable. For the better understanding the relationship between the different starting points and their potential amount of BDR is synoptically presented in the Figure S2

**Figure S2.** Z-score improvement synoptically presented for FEV1, FEF25-75 and sGeff (left-hand) and FRCpleth and sWOB (right-hand) to show the potential percent-improvement in relation to the z-score-levels of the Gaussian distribution.

The application into the 5 severity-levels lower than LLN (Table 1 main text) was significantly different between the 5 target parameters, and within the 3 diagnostic groups (Asthma, ACO, COPD). Accordingly, also the amount of BDR presented significant differences within the diagnostic and within the severity groups.

**REFERENCES**

1. Borrill ZL, Houghton CM, Woodcock AA, Vestbo J, Singh D. Measuring bronchodilation in COPD clinical trials. *Br J Clin Pharmacol.* 2005;59(4):379-384.

2. Santus P, Radovanovic D, Henchi S, et al. Assessment of acute bronchodilator effects from specific airway resistance changes in stable COPD patients. *Respir Physiol Neurobiol.* 2014;197:36-45.

3. Topalovic M, Derom E, Osadnik CR, et al. Airways resistance and specific conductance for the diagnosis of obstructive airways diseases. *Respir Res.* 2015;16:88.

4. Saito T, Takeda A, Hashimoto K, Kobayashi A, Hayamizu T, Hagan GW. Triple therapy with salmeterol/fluticasone propionate 50/250 plus tiotropium bromide improve lung function versus individual treatments in moderate-to-severe Japanese COPD patients: a randomized controlled trial - Evaluation of Airway sGaw after treatment with tripLE. *Int J Chron Obstruct Pulmon Dis.* 2015;10:2393-2404.

5. Jarenback L, Eriksson G, Peterson S, Ankerst J, Bjermer L, Tufvesson E. Bronchodilator response of advanced lung function parameters depending on COPD severity. *Int J Chron Obstruct Pulmon Dis.* 2016;11:2939-2950.

6. Pellegrino R, Viegi G, Brusasco V, et al. Interpretative strategies for lung function tests. *Eur Respir J.* 2005;26(5):948-968.

7. Miller MR, Hankinson J, Brusasco V, et al. Standardisation of spirometry. *Eur Respir J.* 2005;26(2):319-338.

8. Goldman M, Smith HJ, Ulmer WT. Lung function testing: Whole-body plethysmography. *Eur Respir Mon.* 2005;31:15-43.

9. Kraemer R, Baldwin DN, Ammann RA, Frey U, Gallati S. Progression of pulmonary hyperinflation and trapped gas associated with genetic and environmental factors in children with cystic fibrosis. *Respir Res.* 2006;7:138.

10. Kraemer R, Latzin P, Pramana I, Ballinari P, Gallati S, Frey U. Long-term gas exchange characteristics as markers of deterioration in patients with cystic fibrosis. *Respir Res.* 2009;10:106.

11. Kraemer R, Smith H-J, Sigrist T, Giger G, Keller R, Frey M. Diagnostic Accuracy of Methacholine Challenge Tests assessing Airway Hyperreactivity in Asthmatic Patients - a multifunctional Approach. *Respir Res.* 2016;17):154-.

12. Wanger J, Clausen JL, Coates A, et al. Standardisation of the measurement of lung volumes. *Eur Respir J.* 2005;26(3):511-522.

13. Kapsali T, Permutt S, Laube B, Scichilone N, Togias A. Potent bronchoprotective effect of deep inspiration and its absence in asthma. *J Appl Physiol (1985).* 2000;89(2):711-720.

14. Salome CM, Thorpe CW, Diba C, Brown NJ, Berend N, King GG. Airway re-narrowing following deep inspiration in asthmatic and nonasthmatic subjects. *Eur Respir J.* 2003;22(1):62-68.

15. Slats AM, Janssen K, van Schadewijk A, et al. Bronchial inflammation and airway responses to deep inspiration in asthma and chronic obstructive pulmonary disease. *Am J Respir Crit Care Med.* 2007;176(2):121-128.

16. Nensa F, Kotschy-Lang N, Smith HJ, Marek W, Merget R. Assessment of airway hyperresponsiveness: comparison of spirometry and body plethysmography. *Adv Exp Med Biol.* 2013;755:1-9.

17. Hankinson JL, Odencrantz JR, Fedan KB. Spirometric reference values from a sample of the general U.S. population. *Am J Respir Crit Care Med.* 1999;159(1):179-187.

18. Stocks J, Godfrey S, Beardsmore C, Bar-Yishay E, Castile R. Plethysmographic measurements of lung volume and airway resistance. ERS/ATS Task Force on Standards for Infant Respiratory Function Testing. European Respiratory Society/ American Thoracic Society. *Eur Respir J.* 2001;17(2):302-312.

19. Stocks J, Quanjer PH. Reference values for residual volume, functional residual capacity and total lung capacity. ATS Workshop on Lung Volume Measurements. Official Statement of The European Respiratory Society. *Eur Respir J.* 1995;8(3):492-506.

20. Kraemer R, Smith HJ, Matthys H. An alternative approach to define reference of whole-body plethysmography in infants, children and adults. . Eur Respir Soc; 2016 P2729; London.

21. Kraemer R, Smith HJ, Matthys H. Normative reference equations of airway dynamics assessed by whole-body plethsmography during spontaneous breathing transitionally evaluated in infants, children and adults. *Research Square.* 2020;DOI: 10.21203/rs.3.rs-39320/v1.

22. Dubois AB, Botelho SY, Bedell GN, Marshall R, Comroe JH, Jr. A rapid plethysmographic method for measuring thoracic gas volume: a comparison with a nitrogen washout method for measuring functional residual capacity in normal subjects. *J Clin Invest.* 1956;35(3):322-326.

23. Dubois AB, Botelho SY, Comroe JH, Jr. A new method for measuring airway resistance in man using a body plethysmograph: values in normal subjects and in patients with respiratory disease. *J Clin Invest.* 1956;35(3):327-335.

24. Jaeger MJ, Otis AB. Measurement of Airway Resistance with a Volume Displacement Body Plethysmograph. *J Appl Physiol.* 1964;19:813-820.

25. Ulmer WT, Marek W, Rasche K. [Airway resistance curves in obstructive respiratory tract diseases. 8 types of airway resistance curves in spontaneous respiration]. *Fortschr Med.* 1988;106(33):663-664, 665-666, 667.

26. Matthys H, Orth U. Comparative measurements of airway resistance. *Respiration.* 1975;32(2):121-134.

27. Kraemer R. Whole-body plethysmography in the clinical assessment of infants with bronchopulmonary diseases. *Respiration.* 1993;60(1):1-8.

28. Kusenbach G, Pott H, Breuer A, et al. Evaluation of a commercial infant body plethysmography. *Eur Respir J.* 1998;11(5):1211-1213.

29. Zaiss AW, Matthys H. A multiuser system for whole body plethysmographic measurements and interpretation. *Lung.* 1990;168 Suppl:1185-1192.

30. Kraemer R, Blum A, Schibler A, Ammann RA, Gallati S. Ventilation inhomogeneities in relation to standard lung function in patients with cystic fibrosis. *Am J Respir Crit Care Med.* 2005;171(4):371-378.

31. Kraemer R, Delosea N, Ballinari P, Gallati S, Crameri R. Effect of allergic bronchopulmonary aspergillosis on lung function in children with cystic fibrosis. *Am J Respir Crit Care Med.* 2006;174(11):1211-1220.

32. Agostoni E, Mead, J. Statics of the respiratory system. In: Fenn WO, Rahn, H. , ed. *Handbook of Physiology.* American Physiological Society, Washington D.C. ed.1964:411-427.

33. Mead J, Turner JM, Macklem PT, Little JB. Significance of the relationship between lung recoil and maximum expiratory flow. *J Appl Physiol.* 1967;22(1):95-108.

34. Duggan CJ, Castle WD, Berend N. Effects of continuous positive airway pressure breathing on lung volume and distensibility. *J Appl Physiol (1985).* 1990;68(3):1121-1126.

35. Zapletal A, Samanek M, Paul T. *Lung function in children and adolescents.* Basel (Switzerland): Karger; 1987.

36. Quanjer PH, Stocks J, Polgar G, Wise M, Karlberg J, Borsboom G. Compilation of reference values for lung function measurements in children. *Eur Respir J Suppl.* 1989;4:184S-261S.

37. Quanjer PH, Tammeling GJ, Cotes JE, Pedersen OF, Peslin R, Yernault JC. Lung volumes and foreced ventilatory flows. *Eur Respir J.* 1993;Suppl. 16:5-40.

38. Quanjer PH, Hall GL, Stanojevic S, Cole TJ, Stocks J. Age- and height-based prediction bias in spirometry reference equations. *The European respiratory journal.* 2012;40(1):190-197.

39. Quanjer PH, Stanojevic S, Cole TJ, et al. Multi-ethnic reference values for spirometry for the 3-95-yr age range: the global lung function 2012 equations. *Eur Respir J.* 2012;40(6):1324-1343.

40. Kraemer R, Zehnder M, Meister B. Intrapulmonary gas distribution in healthy children. *Respir Physiol.* 1986;65(2):127-137.

41. Lum S, Stocks J, Stanojevic S, et al. Age and height dependence of lung clearance index and functional residual capacity. *The European respiratory journal.* 2013;41(6):1371-1377.

42. Kraemer R, Meister B. Fast real-time moment-ratio analysis of multibreath nitrogen washout in children. *J Appl Physiol.* 1985;59(4):1137-1144.

43. Stanojevic S, Wade A, Stocks J, et al. Reference ranges for spirometry across all ages: a new approach. *Am J Respir Crit Care Med.* 2008;177(3):253-260.

44. Cole TJ, Stanojevic S, Stocks J, Coates AL, Hankinson JL, Wade AM. Age- and size-related reference ranges: a case study of spirometry through childhood and adulthood. *Stat Med.* 2009;28(5):880-898.

45. Doershuk CF, Fisher BJ, Matthews LW. Specific airway resistance from the perinatal period into adulthood. Alterations in childhood pulmonary disease. *Am Rev Respir Dis.* 1974;109(4):452-457.

46. Beardsmore CS, Godfrey S, Shani N, Maayan C, Bar-Yishay E. Airway resistance measurements throughout the respiratory cycle in infants. *Respiration.* 1986;49(2):81-93.

47. Matthys H. The assessment of airways obstruction. *Bull Physiopathol Respir (Nancy).* 1973;9(4):961-978.

48. Yammine S, Singer F, Gustafsson P, Latzin P. Impact of different breathing protocols on multiple-breath washout outcomes in children. *J Cyst Fibros.* 2014;13(2):190-197.

49. Faner R, Agusti A. Multilevel, Dynamic Chronic Obstructive Pulmonary Disease Heterogeneity. A Challenge for Personalized Medicine. *Ann Am Thorac Soc.* 2016;13 Suppl 2:S466-S470.

50. Han MK, Quibrera PM, Carretta EE, et al. Frequency of exacerbations in patients with chronic obstructive pulmonary disease: an analysis of the SPIROMICS cohort. *Lancet Respir Med.* 2017;5(8):619-626.

51. Agusti A, MacNee W. The COPD control panel: towards personalised medicine in COPD. *Thorax.* 2013;68(7):687-690.

52. Pauwels RA, Buist AS, Calverley PM, Jenkins CR, Hurd SS. Global strategy for the diagnosis, management, and prevention of chronic obstructive pulmonary disease. NHLBI/WHO Global Initiative for Chronic Obstructive Lung Disease (GOLD) Workshop summary. *Am J Respir Crit Care Med.* 2001;163(5):1256-1276.

53. Swanney MP, Ruppel G, Enright PL, et al. Using the lower limit of normal for the FEV1/FVC ratio reduces the misclassification of airway obstruction. *Thorax.* 2008;63(12):1046-1051.

54. Quanjer PH, Enright PL, Miller MR, et al. The need to change the method for defining mild airway obstruction. *Eur Respir J.* 2011;37(3):720-722.

55. Scholes S, Moody A, Mindell JS. Estimating population prevalence of potential airflow obstruction using different spirometric criteria: a pooled cross-sectional analysis of persons aged 40-95 years in England and Wales. *BMJ Open.* 2014;4(7):e005685.

56. Hardie JA, Buist AS, Vollmer WM, Ellingsen I, Bakke PS, Morkve O. Risk of over-diagnosis of COPD in asymptomatic elderly never-smokers. *Eur Respir J.* 2002;20(5):1117-1122.

57. Celli BR, Halbert RJ, Isonaka S, Schau B. Population impact of different definitions of airway obstruction. *Eur Respir J.* 2003;22(2):268-273.

58. Roberts SD, Farber MO, Knox KS, et al. FEV1/FVC ratio of 70% misclassifies patients with obstruction at the extremes of age. *Chest.* 2006;130(1):200-206.

59. Medbo A, Melbye H. Lung function testing in the elderly--can we still use FEV1/FVC<70% as a criterion of COPD? *Respir Med.* 2007;101(6):1097-1105.

60. Hansen JE, Sun XG, Wasserman K. Spirometric criteria for airway obstruction: Use percentage of FEV1/FVC ratio below the fifth percentile, not < 70%. *Chest.* 2007;131(2):349-355.

61. Shirtcliffe P, Weatherall M, Marsh S, et al. COPD prevalence in a random population survey: a matter of definition. *Eur Respir J.* 2007;30(2):232-239.

62. Miller MR, Quanjer PH, Swanney MP, Ruppel G, Enright PL. Interpreting lung function data using 80% predicted and fixed thresholds misclassifies more than 20% of patients. *Chest.* 2011;139(1):52-59.

63. Bakke PS, Ronmark E, Eagan T, et al. Recommendations for epidemiological studies on COPD. *Eur Respir J.* 2011;38(6):1261-1277.

64. Quanjer PH, Ruppel GL. Diagnosing COPD: high time for a paradigm shift. *Respir Care.* 2011;56(11):1861-1863.
